# Supplementary material for: Heterostructured CoO-Co3O4nanoparticles anchored on nitrogen-doped hollow carbon spheres as cathode catalysts for Li–O2batteries
Source: Royal Society of Chemistry journal article supplement (doi:10.1039/c9nr03521d), 2019-01-01
Supplement: c9nr03521d1.pdf [file c9nr03521d1.pdf]

## Heterostructure CoO-Co<sub>3</sub>O<sub>4</sub> nanoparticles anchored on nitrogen-doped hollow carbon spheres as cathode catalysts for Li-O<sub>2</sub> batteries

Lixia Feng, Yongliang Li, Lingna Sun\*, Hongwei Mi, Xiangzhong Ren, Peixin Zhang

College of Chemistry and Environmental Engineering, Shenzhen University, Shenzhen, Guangdong 518060, P.R. China

\* Corresponding author: Lingna Sun, Tel/Fax: +86-755-26538657, E-mail: lindasun1999@126.com; sunln@szu.edu.cn

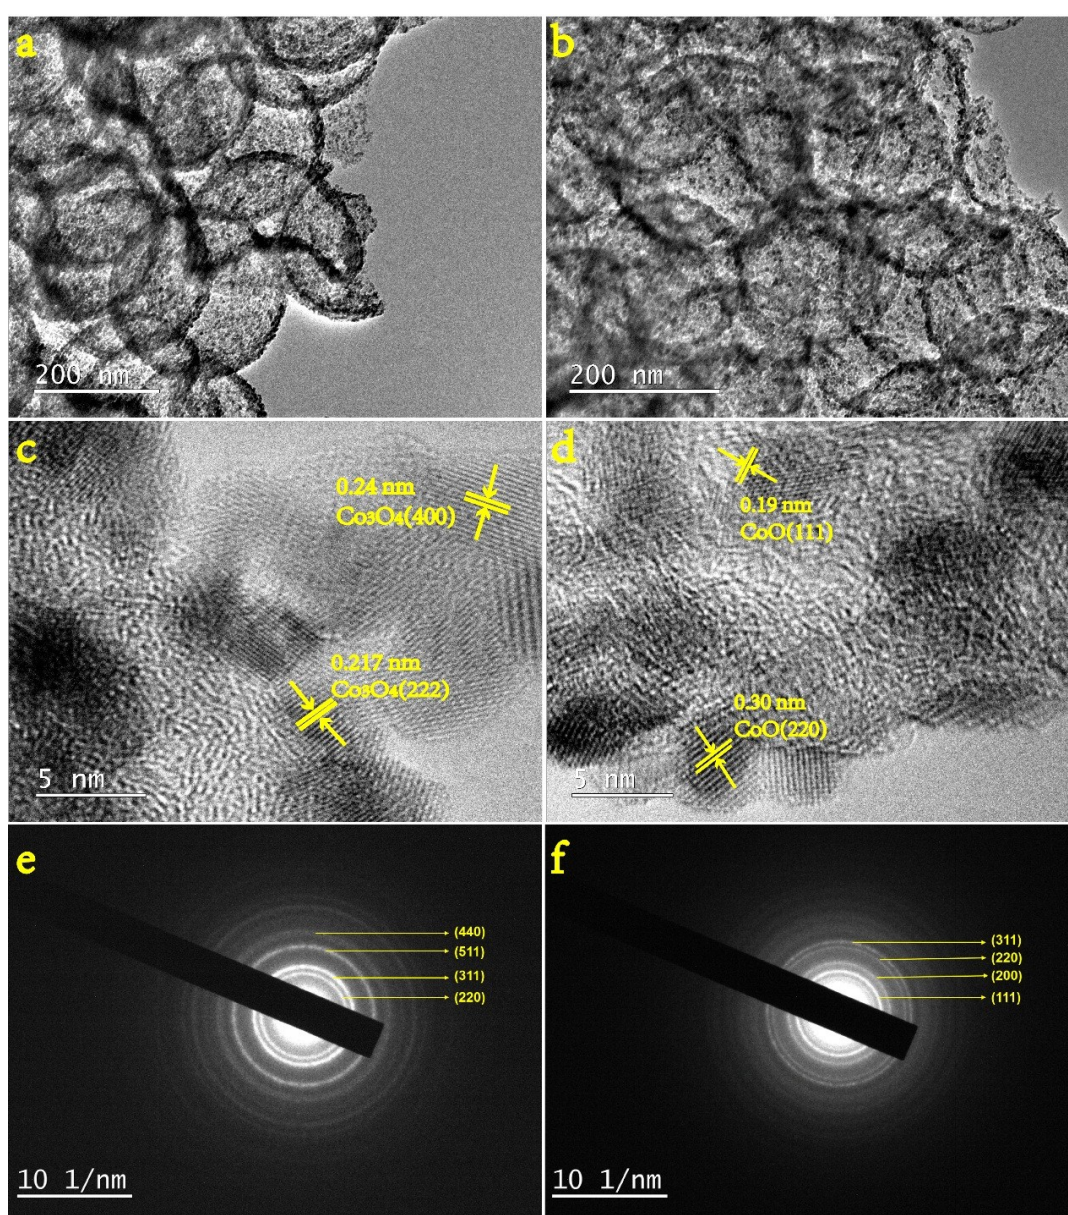

Figure S1. TEM images of (a) N-HC@Co<sub>3</sub>O<sub>4</sub> and (b) N-HC@CoO; HRTEM images of (c) N-HC@Co<sub>3</sub>O<sub>4</sub> and (d) N-HC@CoO; SAED patterns of (e) N-HC@Co<sub>3</sub>O<sub>4</sub> and (f) N-HC@CoO

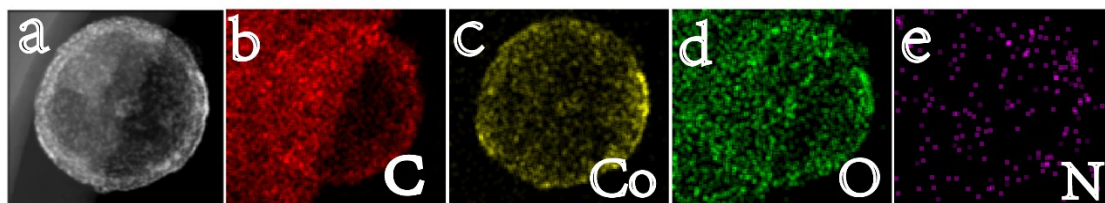

Figure S2. Element present in the N-HC@CoO-Co<sub>3</sub>O<sub>4</sub> composite by element mapping of (b) C, (c) Co, (d) O, (e) N

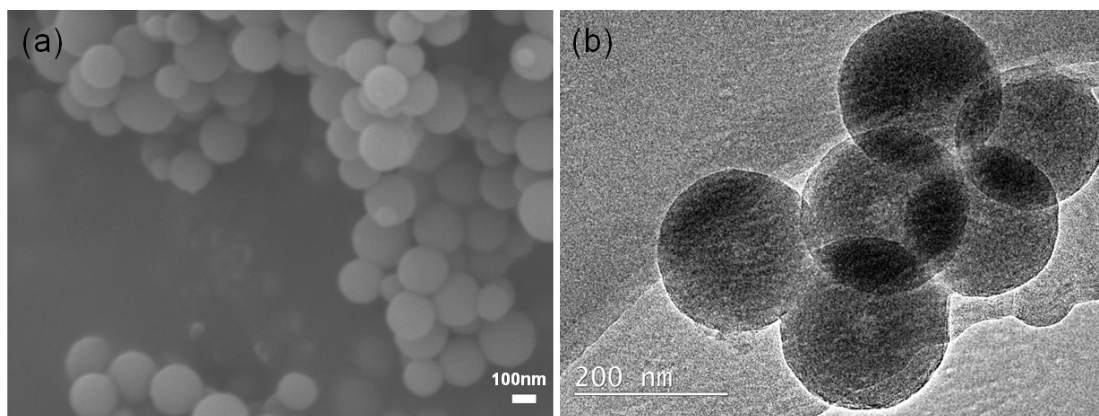

Figure S3. FESEM images of SiO<sub>2</sub>@NC (a) and TEM image of SiO<sub>2</sub>@NC.

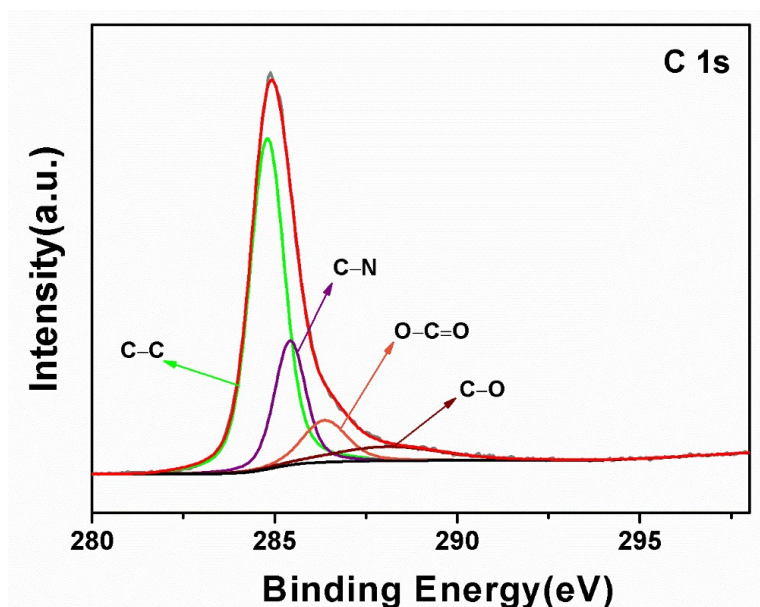

Figure S4. XPS spectrum of the C 1s for the N-HC@CoO-Co<sub>3</sub>O<sub>4</sub> composite.

The finely scanned C1s spectrum of N-HC@CoO-Co<sub>3</sub>O<sub>4</sub> is shown in Figure S4. Among the four photon energies, the asymmetric C1s spectrum centered at 284.3 eV is C-C group. The peak at 285.6 eV reflects the bonding



structure of the C-N bond, which may be derived from the substitution and defect of the N atom or the edge of the N-HC. The peak at 286.0 eV is attributed to O-C=O group. Due to the higher electronegative N atom, the weakest peak at 288.5 eV is attributed to other binding configurations, such as C-O bond that can form at the N-HC edge. The results show that a large amount of N and O groups are generated on the surface of the N-HC after the calcination treatment.

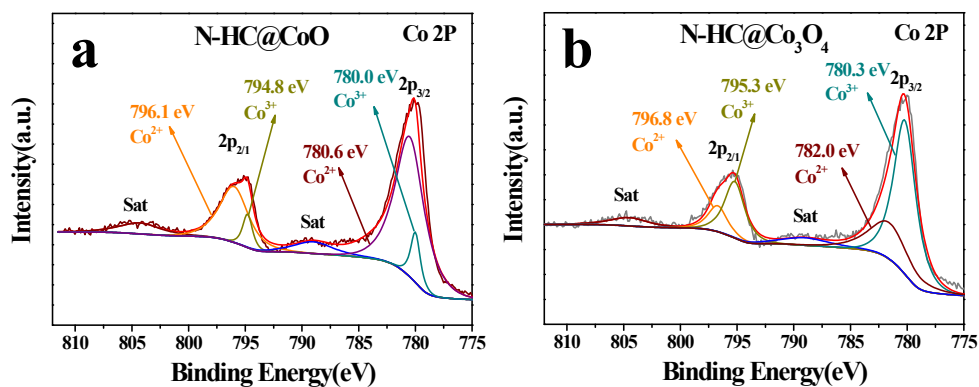

Figure S5. The high-resolution Co 2p XPS spectra for (a) N-HC@CoO and (b) N-HC@Co<sub>3</sub>O<sub>4</sub>.

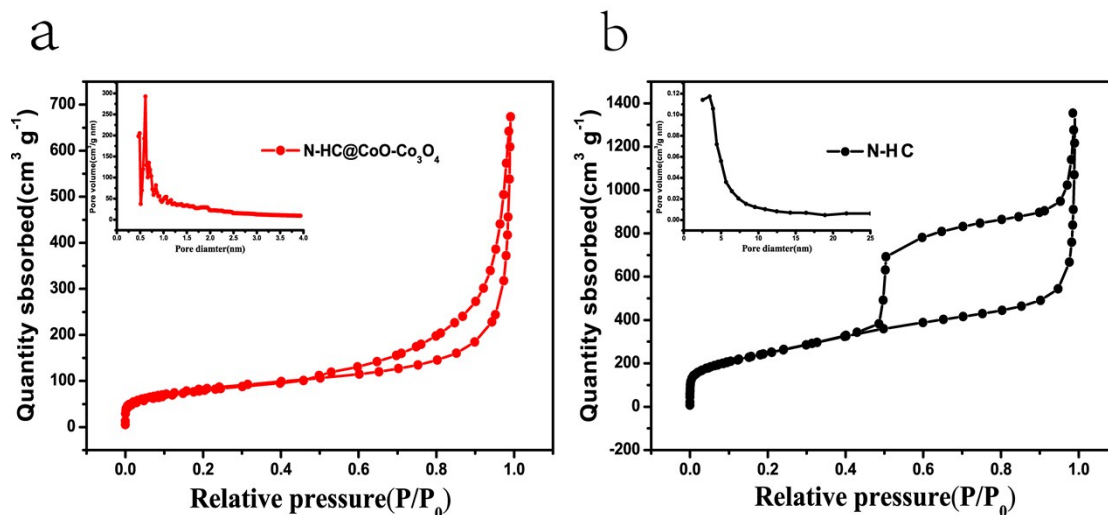

Figure S6. Nitrogen adsorption/desorption isotherm and the corresponding pore size distribution (inset) of N-HC (a) and N-HC@CoO-Co<sub>3</sub>O<sub>4</sub> (b).

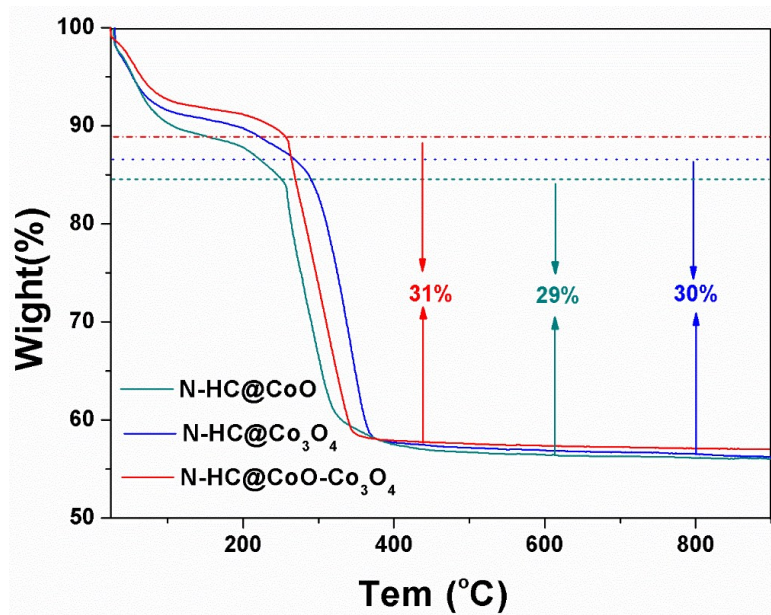

Figure S7. TG curves for different samples under air atmosphere

The TG curves of the three obtained samples are shown in Figure S7. It seems that the trends of mass loss rates in the TG curves are probably the same. At temperature of 0-100°C, the mass reduction is attributed to volatile substances such as water molecules adsorbed on the surface of the sample. The mass loss at around 200-400°C is attributed to the carbon decomposition, which calculated to be around 30wt%.

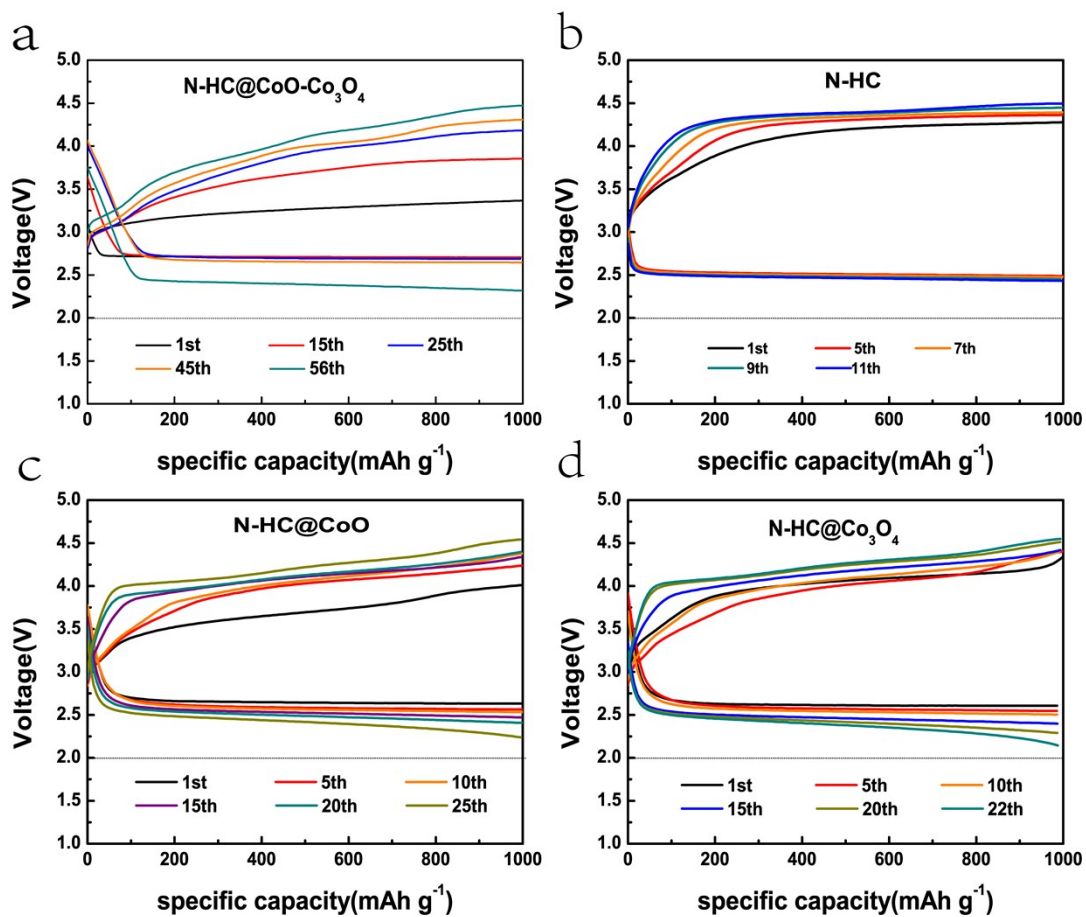

Figure S8. Galvanostatic discharge-charge curves of the N-HC@CoO-Co<sub>3</sub>O<sub>4</sub>(a), N-HC(b), N-HC@CoO (c) and N-HC@Co<sub>3</sub>O<sub>4</sub>(d) cathode at various cycles with a capacity limitation of 1000 mAh g<sup>-1</sup>.

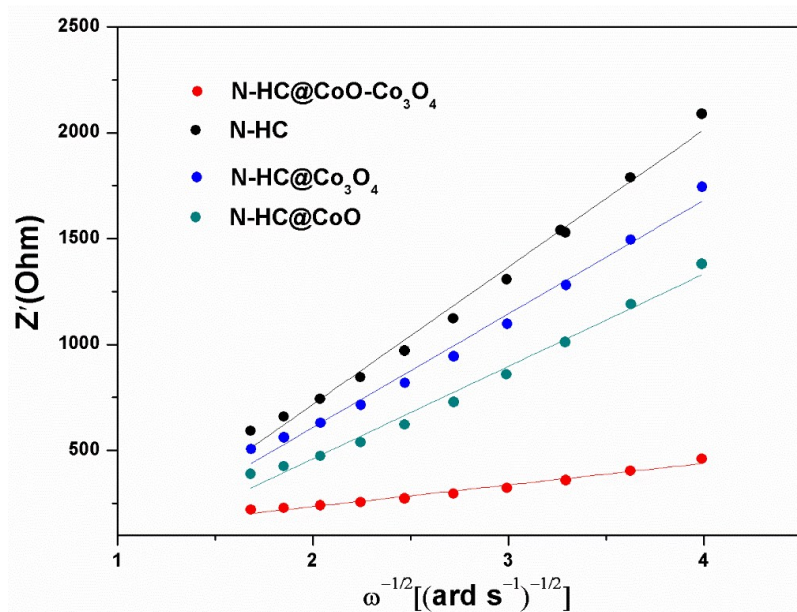

Figure S9. The line relationship of the four cathode materials between  $Z'$  and  $\omega^{-1/2}$  in the frequency region of 0.1-0.01 Hz

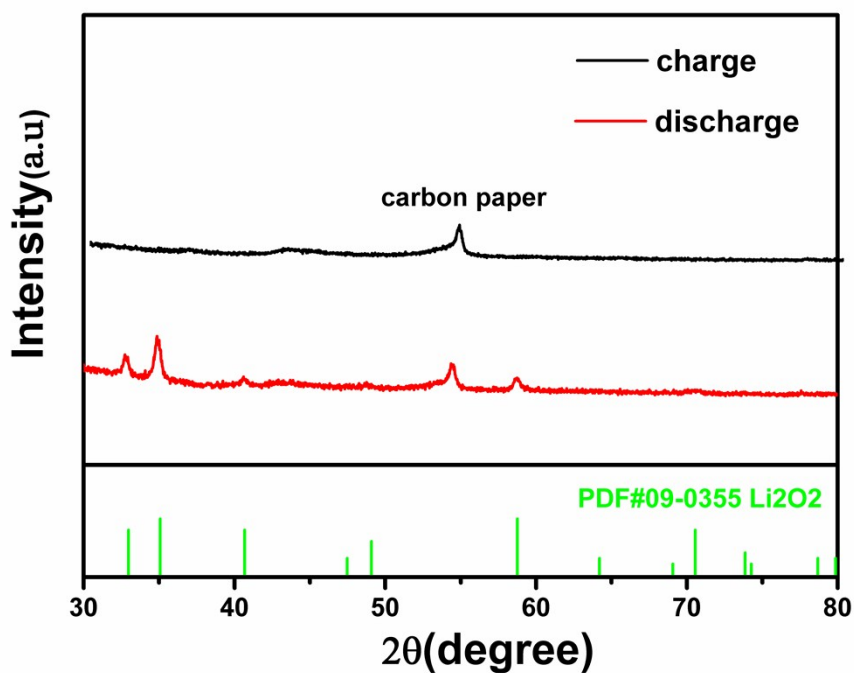

Fig S10. XRD patterns of the N-HC@CoO-Co<sub>3</sub>O<sub>4</sub> cathodes at first discharge or charge states

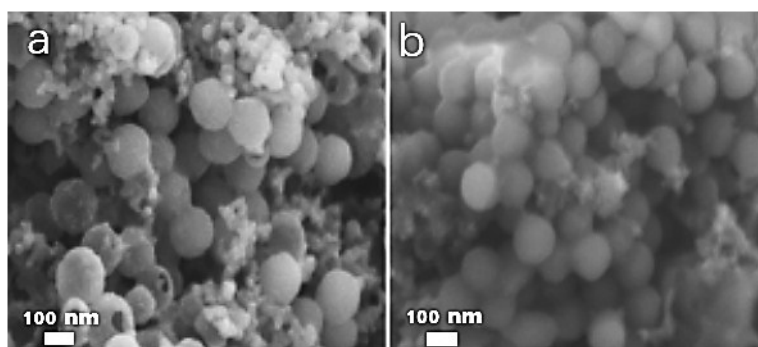

Figure S11. SEM images of the N-HC@CoO-Co<sub>3</sub>O<sub>4</sub> after the 20th cycle (a) discharge, (b) recharge.

Figure S11a and b correspond to the SEM images of the discharge and recharge state of the N-HC@CoO-Co<sub>3</sub>O<sub>4</sub> cathode after 20th cycle testing at a current density of 300 mA g<sup>-1</sup> and a limiting capacity of 500 mAh g<sup>-1</sup>. It can be seen that after several cycles, the spherical structure of N-HC@CoO-Co<sub>3</sub>O<sub>4</sub> composite remained very well. It should also be pointed out that the discharged product deposited on its surface could not be ignored, which finally leads to an increase in the overpotential of the battery after 20 cycles (Figure. 4).

Table S1. XPS analysis of composition element content

| Element | N-HC    | N-HC@CoO-Co <sub>3</sub> O <sub>4</sub> |
|---------|---------|-----------------------------------------|
|         | Atomic% |                                         |
| C       | 86.29   | 76.87                                   |
| Co      | --      | 3.87                                    |
| O       | 7.37    | 15.74                                   |
| N       | 5.98    | 3.61                                    |

Table. S2.  $R_2$ ,  $\sigma$  and  $D_{Li^+}$  values determined from the EIS for all the cathodes

|                                         | $R_2$ ( $\Omega$ ) | $\sigma$ ( $\Omega \text{ cm}^2 \text{ s}^{-0.5}$ ) | $D_{Li^+}$ ( $\text{cm}^2 \text{ s}^{-1}$ ) |
|-----------------------------------------|--------------------|-----------------------------------------------------|---------------------------------------------|
| N-HC@CoO-Co <sub>3</sub> O <sub>4</sub> | 60.5               | 102.05                                              | $1.3 \times 10^{-14}$                       |
| N-HC                                    | 177                | 648.3                                               | $3.0 \times 10^{-15}$                       |
| N-HC@ CoO                               | 68.9               | 436.49                                              | $7.0 \times 10^{-15}$                       |
| N-HC@Co <sub>3</sub> O <sub>4</sub>     | 101.3              | 596.4                                               | $4.0 \times 10^{-15}$                       |

Note:  $R_2$  represents the resistance of the charge during the transfer process in the electrode material from the equivalent circuit in the main text.

Table S3. Comparison of Li-O<sub>2</sub> battery performance of N-HC@CoO-Co<sub>3</sub>O<sub>4</sub> cathode with representative existing cathodes reported in the literature.

| Catalyst                                                                                                            | Electrolyte                               | Current Density             | Discharge /charge Plateau(V) | Capacity (mAhg <sup>-1</sup> ) | Cycles /limit capacity (mAhg <sup>-1</sup> ) | Ref.      |
|---------------------------------------------------------------------------------------------------------------------|-------------------------------------------|-----------------------------|------------------------------|--------------------------------|----------------------------------------------|-----------|
| Co <sub>3</sub> O <sub>4</sub> nanotube                                                                             | LiCF <sub>3</sub> SO <sub>3</sub> /TEGDME | 25 mA cm <sup>-2</sup>      | 0.99                         | 4299                           | 40/1000                                      | 1         |
| RuO <sub>2</sub> /Co <sub>3</sub> O <sub>4</sub> nanowires                                                          | LiPF <sub>6</sub> /TEGDME                 | 200 mA g <sup>-1</sup>      | 1.14                         | 10 850                         | 47/500                                       | 2         |
| CoFe <sub>2</sub> O <sub>4</sub> /rGO                                                                               | LiTFSI/ TEGDME                            | 50mAg <sup>-1</sup>         | ~1.3                         | 12 235                         | 40/1000                                      | 2         |
| CoO@Co/C-IL                                                                                                         | LiClO <sub>4</sub> /DMSO                  | 100 mA g <sup>-1</sup>      | 1.11                         | 2660                           | 55/800                                       | 3         |
| Co <sub>3</sub> O <sub>4</sub> nanosheets                                                                           | LiTFSI/TEGDME                             | 200 mA g <sup>-1</sup>      | 0.9                          | 11 882                         | 80/500<br>30/1000                            | 4         |
| Co-CoO/N-CNR                                                                                                        | LiTFSI/ TEGDME                            | 100 mA g <sup>-1</sup>      | 1.19                         | 10555                          | 86/1000                                      | 5         |
| CoO/C                                                                                                               | LiTFSI/TEGDME                             | 200 mAg <sup>-1</sup>       | -                            | 5637                           | 50/1000                                      | 6         |
| RuO <sub>2</sub> /La <sub>0.6</sub> Sr <sub>0.4</sub> Co <sub>0.8</sub> Mn <sub>0.2</sub> O <sub>3</sub> Nanofibers | LiTFSI/ TEGDME                            | 50 mA g <sup>-1</sup>       | 1.07                         | 12741.7                        | 100/500                                      | 7         |
| Co/CNF                                                                                                              | LiTFSI/ TEGDME                            | 100 mA g <sup>-1</sup><br>① | 0.81                         | 4583                           | 40/500                                       | 8         |
| N-HC@CoO-Co <sub>3</sub> O <sub>4</sub>                                                                             | LiCF <sub>3</sub> SO <sub>3</sub> /TEGDME | 300 mA g <sup>-1</sup>      | 0.61                         | 24265                          | 112/500<br>56/1000                           | This work |

#### Reference

1. Liu, L.; Guo, H.; Hou, Y.; Wang, J.; Fu, L.; Chen, J.; Liu, H.; Wang, J.; Wu, Y. *Journal of Materials Chemistry A* **2017**, 5, (28), 14673-14681.
2. Cao, Y.; Cai, S. R.; Fan, S. C.; Hu, W. Q.; Zheng, M. S.; Dong, Q. F. *Faraday discussions* **2014**, 172, 215-21.
3. Ni, W.; Liu, S.; Fei, Y.; He, Y.; Ma, X.; Lu, L.; Deng, Y. *Journal of Materials Chemistry A* **2016**, 4, (20), 7746-7753.
4. Wu, F.; Zhang, X.; Zhao, T.; Chen, R.; Ye, Y.; Xie, M.; Li, L. *Journal of Materials Chemistry A* **2015**, 3, (34), 17620-17626.



5. Hyun, S.; Shanmugam, S. *Journal of Power Sources* **2017**, 354, 48-56.
6. Gao, R.; Li, Z.; Zhang, X.; Zhang, J.; Hu, Z.; Liu, X. *ACS Catalysis* **2015**, 6, (1), 400-406.
7. Zhang, X.; Gong, Y.; Li, S.; Sun, C. *ACS Catalysis* **2017**, 7, (11), 7737-7747.
8. Cao, Y.; Lu, H.; Hong, Q.; Bai, J.; Wang, J.; Li, X. *Journal of Power Sources* **2017**, 368, 78-87.
